# Supplementary material
Source: ML conference proceedings conference paper supplement (https://openreview.net/forum?id=bjo26ERkai)
Supplement: supplementary_material [file supp.pdf › long_range_dep-main/supp.pdf]

Yi Tay, Mostafa Dehghani, Samira Abnar, Yikang Shen, Dara Bahri, Philip Pham, Jinfeng Rao, Liu Yang, Sebastian Ruder, and Donald Metzler. Long range arena : A benchmark for efficient transformers. In *International Conference on Learning Representations*, 2021. URL <https://openreview.net/forum?id=qVyeW-grC2k>.

## A TASK EXAMPLES

| Task   | Description                                                | $x$          | $f(x)$                             |
|--------|------------------------------------------------------------|--------------|------------------------------------|
| base   | Reproduce string unchanged                                 | JUeQoLmUdF   | JUeQoLmUdF                         |
| rev    | Reverse string                                             | JUeQoLmUdF   | FdUmLoQeUJ                         |
| even   | If string length is even, reproduce string                 | JUeQoLmUdF   | JUeQoLmUdF                         |
|        | If it is odd, reverse string                               | JUeQoLmUdFa  | aFdUmLoQeUJ                        |
| odd    | Identify any character that appears an odd number of times | fQbfhQMb     | hM                                 |
| sort   | Sort characters alphabetically                             | JUeQoLmUdF   | FJLQUUdemo                         |
| pal    | Add character to make palindrome                           | CoIBnnBoC    | CoIBnnBIoC                         |
| dyck   | Add character to make valid Dyck string                    | dfBaaccBeed  | dfBaaccBfeed<br>or<br>dffBaaccBeed |
| case   | Switch case of each character                              | JUeQoLmUdF   | juEqOlMuDf                         |
| period | Identify repeated substring                                | mIoHmIoHmIoH | mIoH                               |

Table 2: Description of tasks

## B FURTHER RESULTS

### B.1 EFFECT OF MODEL SIZE

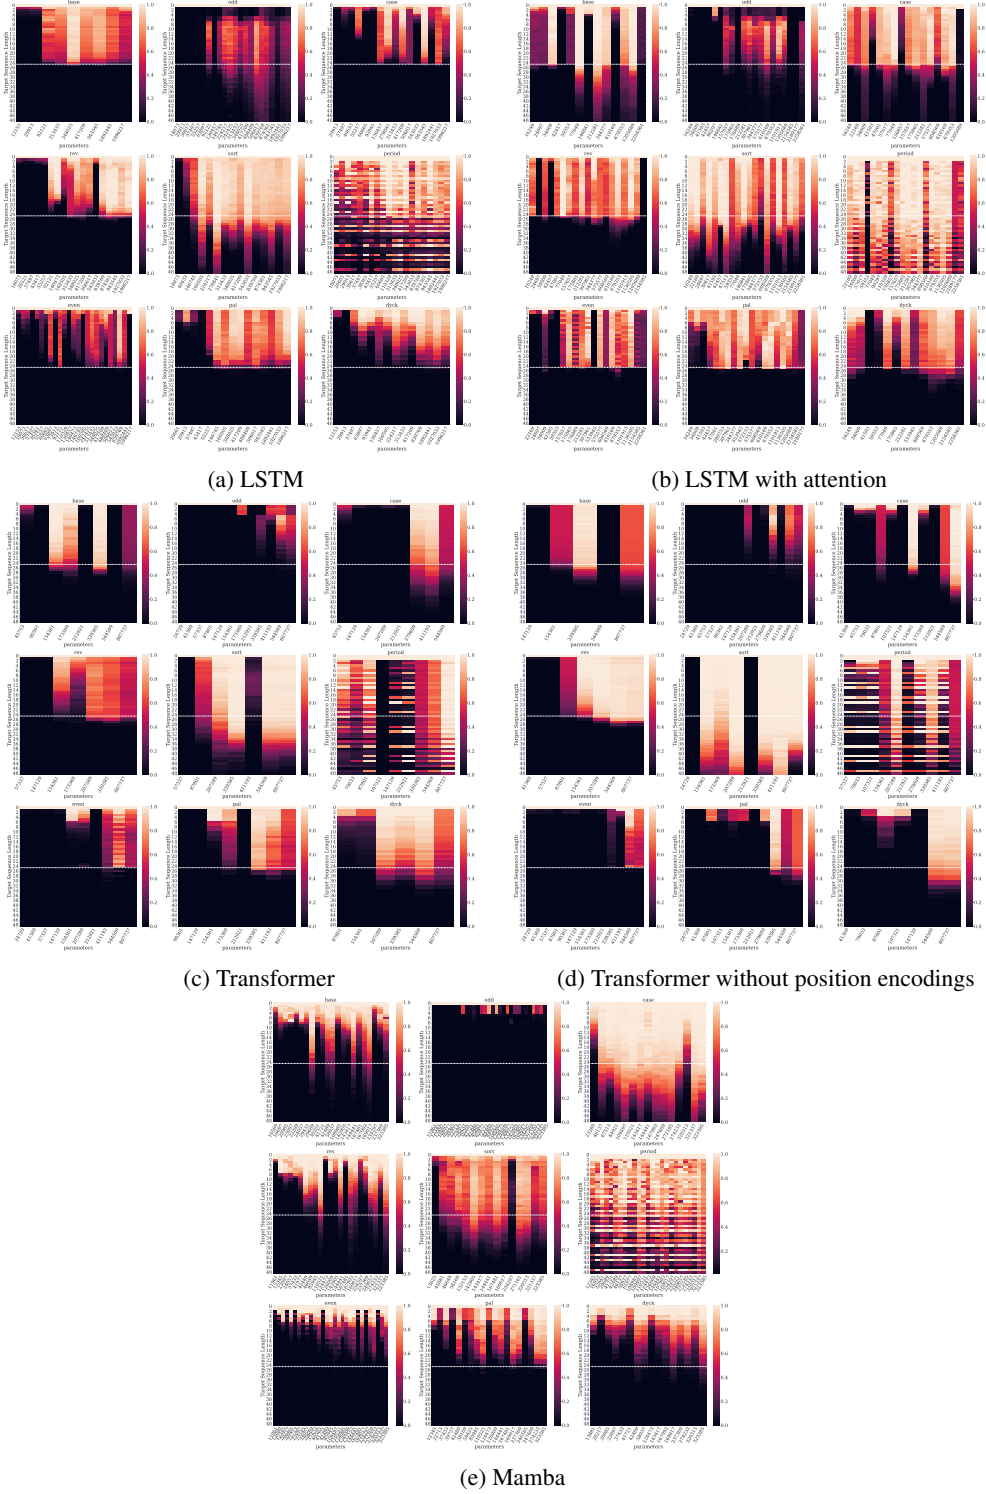

Figure 5: Accuracy broken down by sequence length across models with different numbers of parameters

## B.2 CROSS-TASK COMPARISON

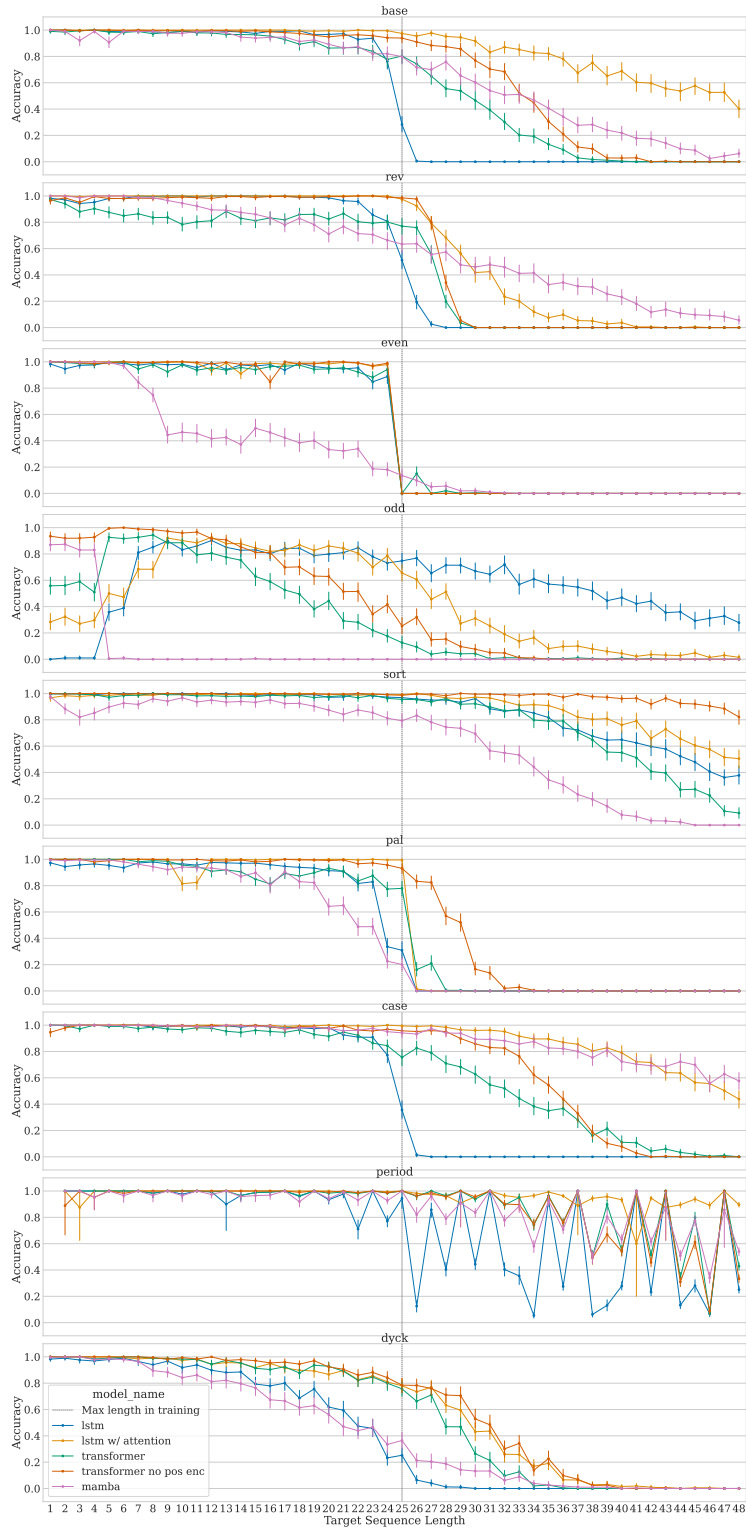

Figure 6: Best model performance on each task shown across target sequence length

## C HYPERPARAMETER DETAILS

|                          |        | Number of<br>Parameters | Embedding<br>Size | Number of<br>Layers | Hidden<br>Size | Learning<br>Rate | Batch<br>Size |
|--------------------------|--------|-------------------------|-------------------|---------------------|----------------|------------------|---------------|
| LSTM                     | base   | 313,433                 | 32                | 1                   | 256            | 0.00045          | 256           |
|                          | rev    | 839,769                 | 32                | 2                   | 256            | 0.00010          | 32            |
|                          | even   | 506,617                 | 64                | 4                   | 128            | 0.00021          | 128           |
|                          | odd    | 839,769                 | 32                | 2                   | 256            | 0.00425          | 256           |
|                          | sort   | 543,033                 | 128               | 4                   | 128            | 0.00425          | 128           |
|                          | pal    | 1,927,033               | 64                | 4                   | 256            | 0.00095          | 128           |
|                          | dyck   | 1,892,441               | 32                | 4                   | 256            | 0.00010          | 64            |
|                          | case   | 943,545                 | 128               | 2                   | 256            | 0.00021          | 128           |
|                          | period | 313,433                 | 32                | 1                   | 256            | 0.00900          | 32            |
| LSTM with at-<br>tention | base   | 212,281                 | 128               | 1                   | 128            | 0.00425          | 64            |
|                          | rev    | 679,353                 | 128               | 1                   | 256            | 0.00425          | 256           |
|                          | even   | 610,169                 | 64                | 1                   | 256            | 0.00010          | 32            |
|                          | odd    | 610,169                 | 64                | 1                   | 256            | 0.00425          | 256           |
|                          | sort   | 47,513                  | 64                | 4                   | 32             | 0.00425          | 128           |
|                          | pal    | 1,136,505               | 64                | 2                   | 256            | 0.00900          | 256           |
|                          | dyck   | 679,353                 | 128               | 1                   | 256            | 0.00201          | 256           |
|                          | case   | 212,281                 | 128               | 1                   | 128            | 0.00425          | 256           |
|                          | period | 212,281                 | 128               | 1                   | 128            | 0.00900          | 64            |

Table 3: Best hyperparams for LSTMs

|                                              |        | Number of<br>Parameters | Embedding<br>Size | Number of<br>Layers | Feedforward<br>Dimension | Number of<br>Heads | Learning<br>Rate | Batch<br>Size |
|----------------------------------------------|--------|-------------------------|-------------------|---------------------|--------------------------|--------------------|------------------|---------------|
| Transformer                                  | base   | 807,737                 | 128               | 4                   | 512                      | 4                  | 0.00010          | 32            |
|                                              | rev    | 339,385                 | 64                | 4                   | 512                      | 4                  | 0.00021          | 32            |
|                                              | even   | 544,569                 | 128               | 4                   | 256                      | 4                  | 0.00010          | 32            |
|                                              | odd    | 807,737                 | 128               | 4                   | 512                      | 4                  | 0.00010          | 256           |
|                                              | sort   | 544,569                 | 128               | 4                   | 256                      | 4                  | 0.00010          | 128           |
|                                              | pal    | 339,385                 | 64                | 4                   | 512                      | 8                  | 0.00045          | 32            |
|                                              | dyck   | 544,569                 | 128               | 4                   | 256                      | 8                  | 0.00045          | 256           |
|                                              | case   | 411,193                 | 128               | 2                   | 512                      | 8                  | 0.00201          | 256           |
|                                              | period | 807,737                 | 128               | 4                   | 512                      | 8                  | 0.00201          | 128           |
| Transformer<br>without position<br>encodings | base   | 807,737                 | 128               | 4                   | 512                      | 4                  | 0.00021          | 128           |
|                                              | rev    | 544,569                 | 128               | 4                   | 256                      | 8                  | 0.00010          | 128           |
|                                              | even   | 807,737                 | 128               | 4                   | 512                      | 8                  | 0.00021          | 64            |
|                                              | odd    | 807,737                 | 128               | 4                   | 512                      | 8                  | 0.00021          | 256           |
|                                              | sort   | 411,193                 | 128               | 2                   | 512                      | 8                  | 0.00045          | 128           |
|                                              | pal    | 807,737                 | 128               | 4                   | 512                      | 8                  | 0.00021          | 256           |
|                                              | dyck   | 544,569                 | 128               | 4                   | 256                      | 4                  | 0.00010          | 32            |
|                                              | case   | 807,737                 | 128               | 4                   | 512                      | 4                  | 0.00010          | 32            |
|                                              | period | 807,737                 | 128               | 4                   | 512                      | 4                  | 0.00095          | 128           |

Table 4: Best hyperparams for Transformers

|       |        | Number of<br>Parameters | Embedding<br>Size | d.state | d.conv | expand | Learning<br>Rate | Batch<br>Size |
|-------|--------|-------------------------|-------------------|---------|--------|--------|------------------|---------------|
|       | base   | 169,017                 | 128               | 8       | 64     | 2      | 0.00425          | 32            |
|       | rev    | 323,385                 | 128               | 8       | 64     | 4      | 0.00900          | 256           |
|       | even   | 169,017                 | 128               | 8       | 64     | 2      | 0.00425          | 256           |
|       | odd    | 72,121                  | 64                | 2       | 16     | 4      | 0.00425          | 256           |
| Mamba | sort   | 142,905                 | 128               | 2       | 32     | 2      | 0.00095          | 32            |
|       | pal    | 323,385                 | 128               | 8       | 64     | 4      | 0.00201          | 128           |
|       | dyck   | 323,385                 | 128               | 8       | 64     | 4      | 0.00095          | 64            |
|       | case   | 321,337                 | 128               | 4       | 64     | 4      | 0.00425          | 256           |
|       | period | 321,337                 | 128               | 4       | 64     | 4      | 0.00010          | 128           |

Table 5: Best hyperparams for Mamba
